# Supplementary material for: FOXO3-mediated chemo-protection in high-stage neuroblastoma depends on wild-type TP53 and SESN3
Source: PubMed Central journal article supplement (PMC5671944; doi:10.1038/onc.2017.288), 2017-09-04

# Supplemental Figure S1:

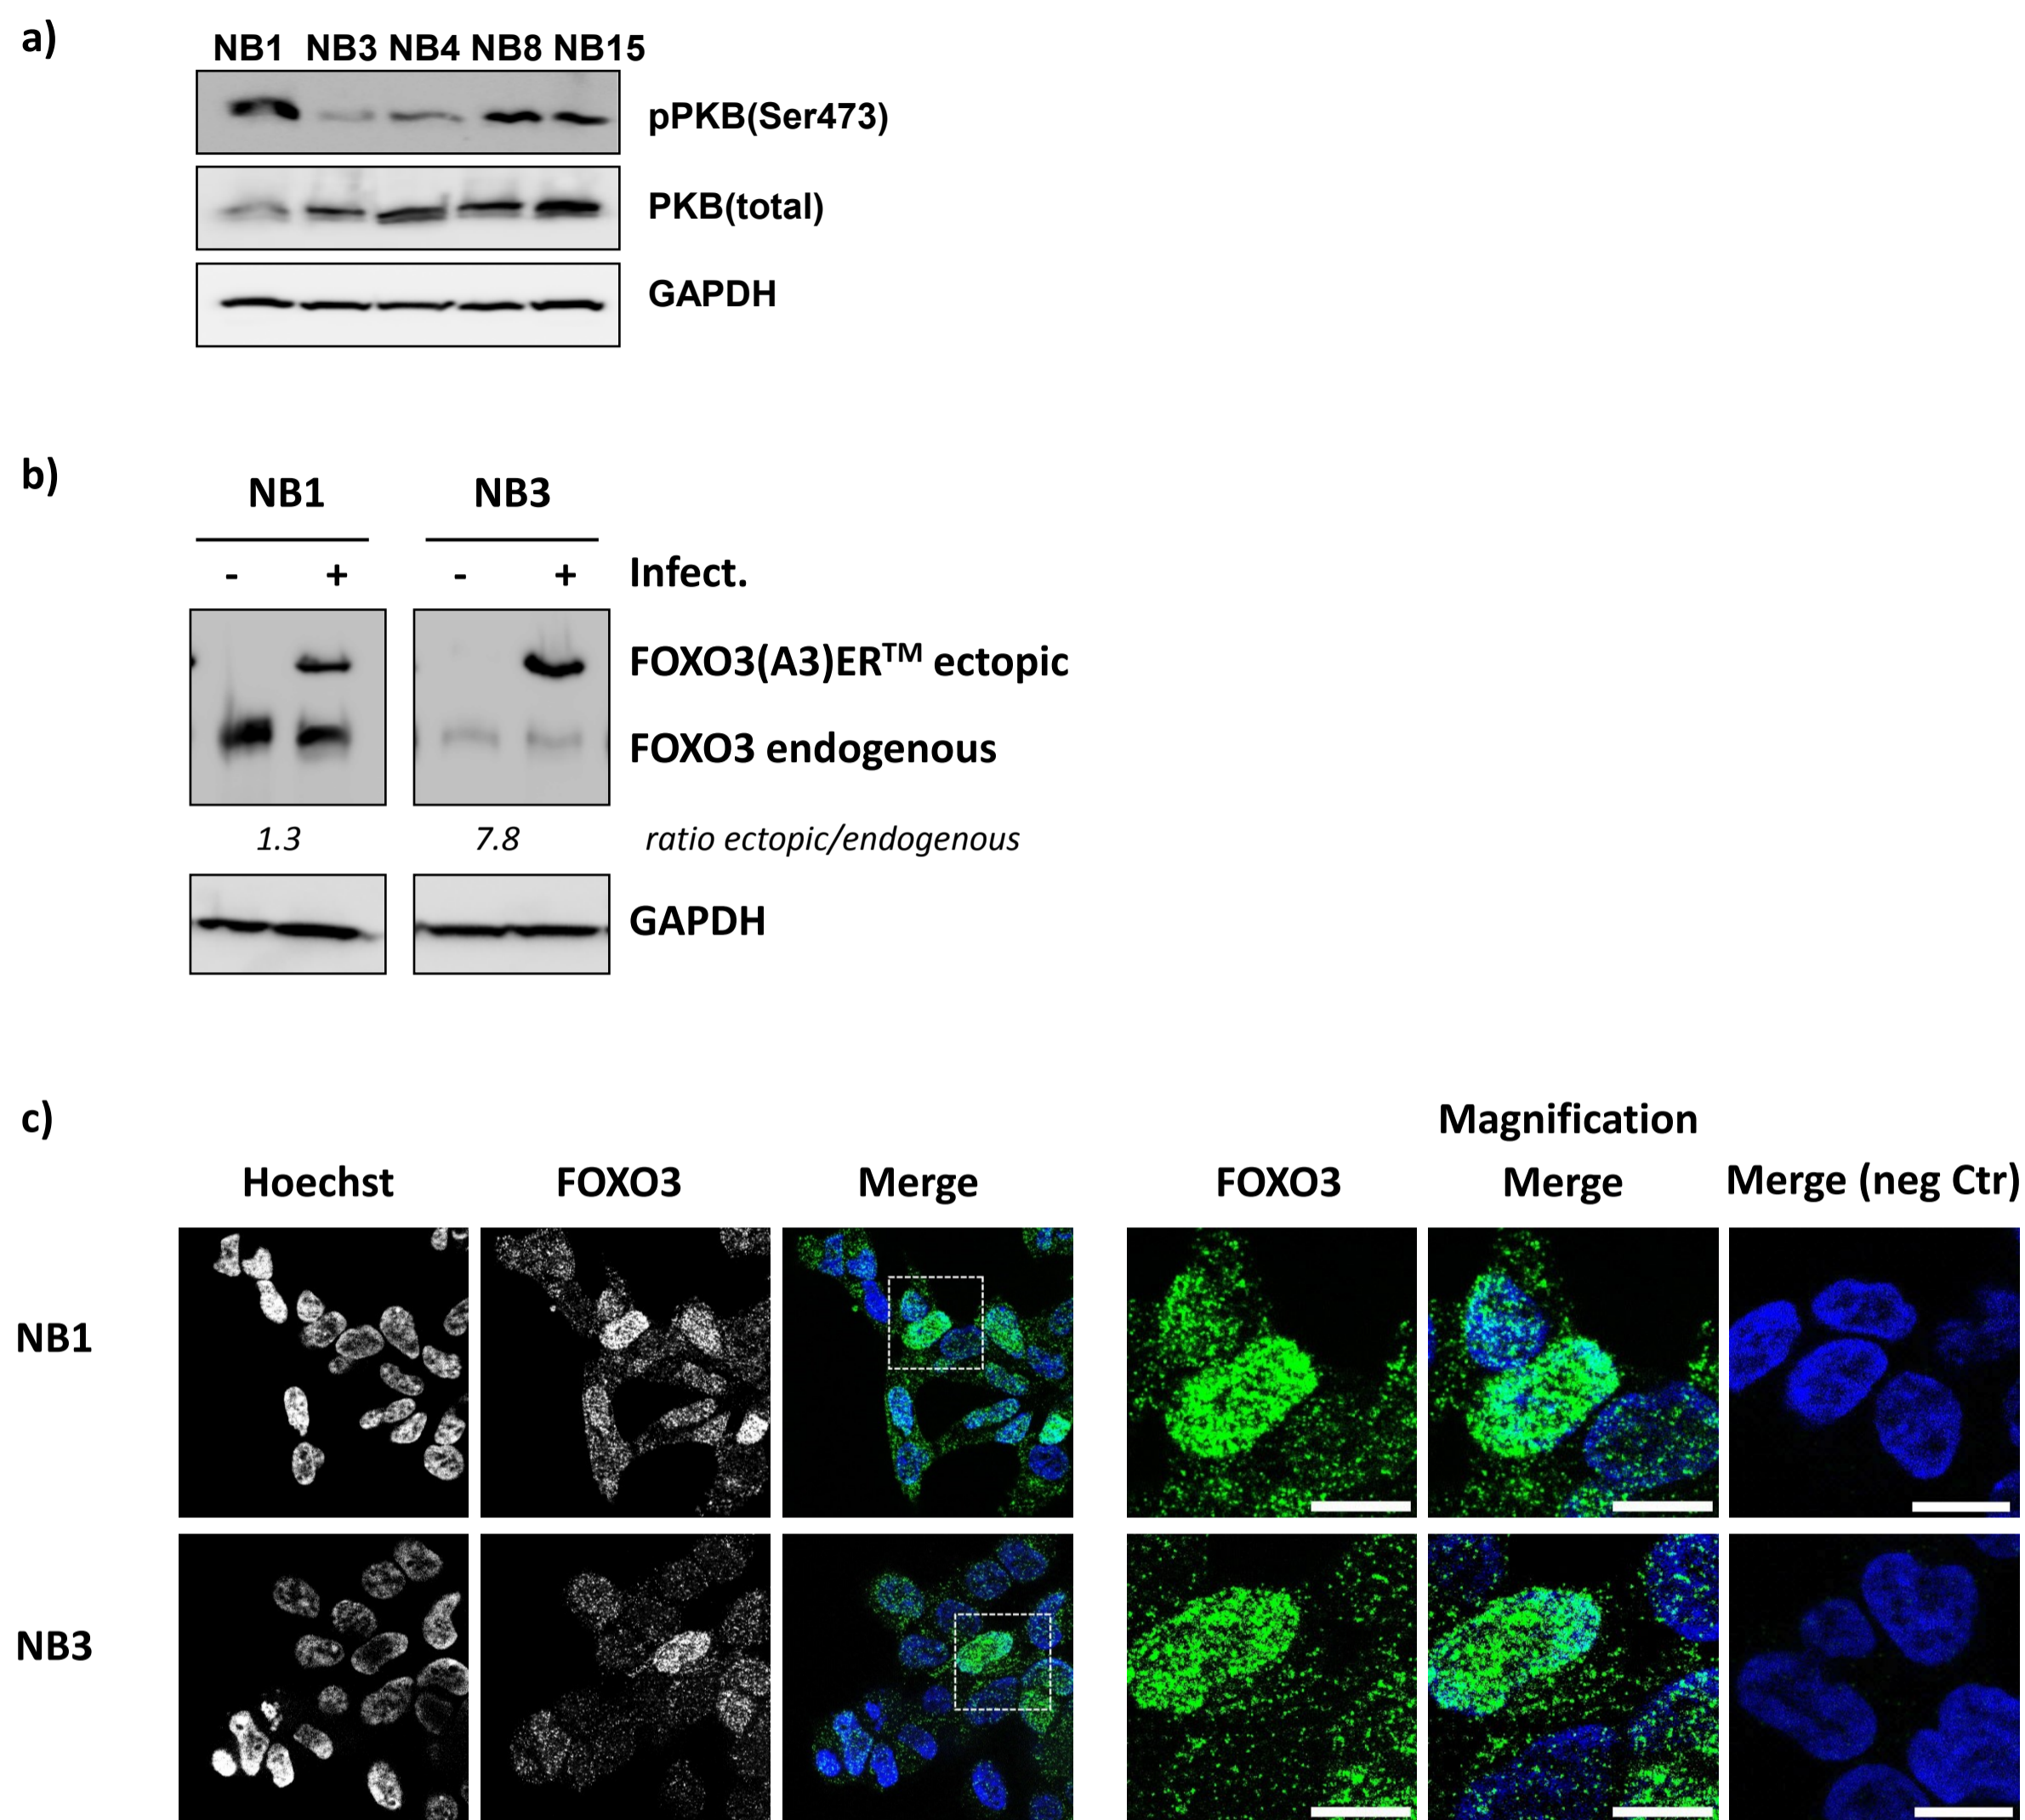

# Supplemental Figure S2:

a)

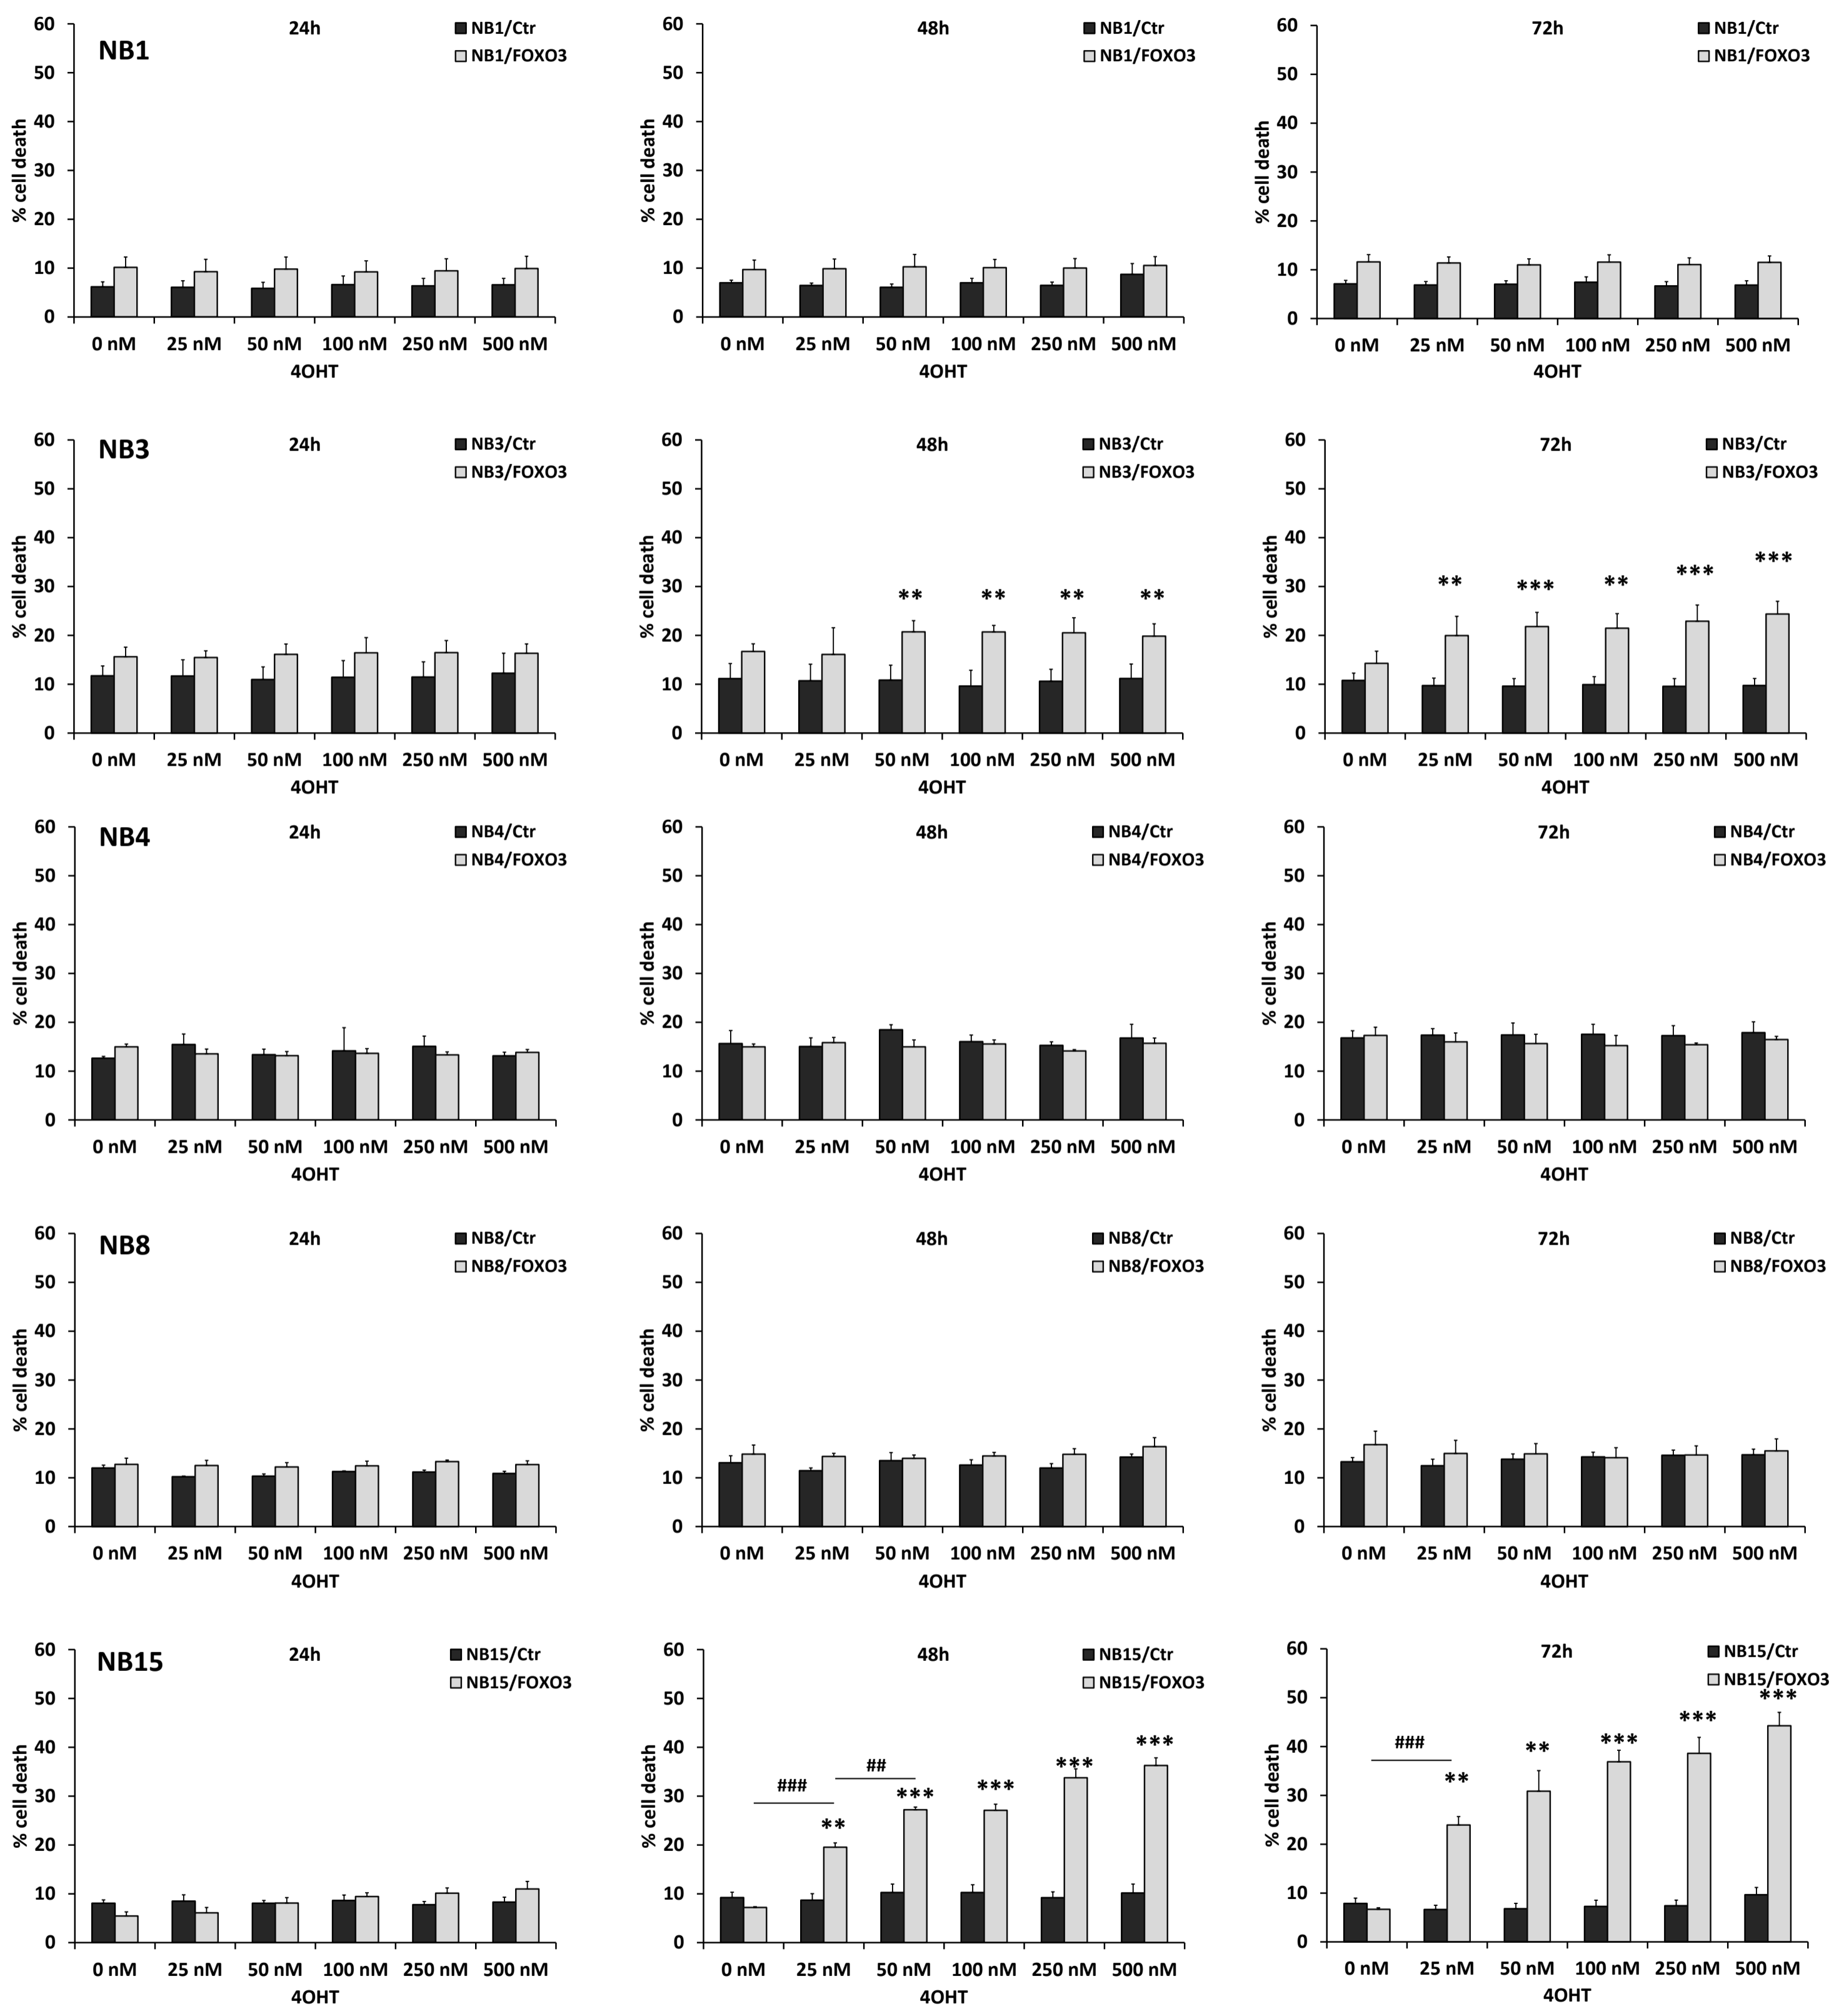

b)

NB4/FOXO3

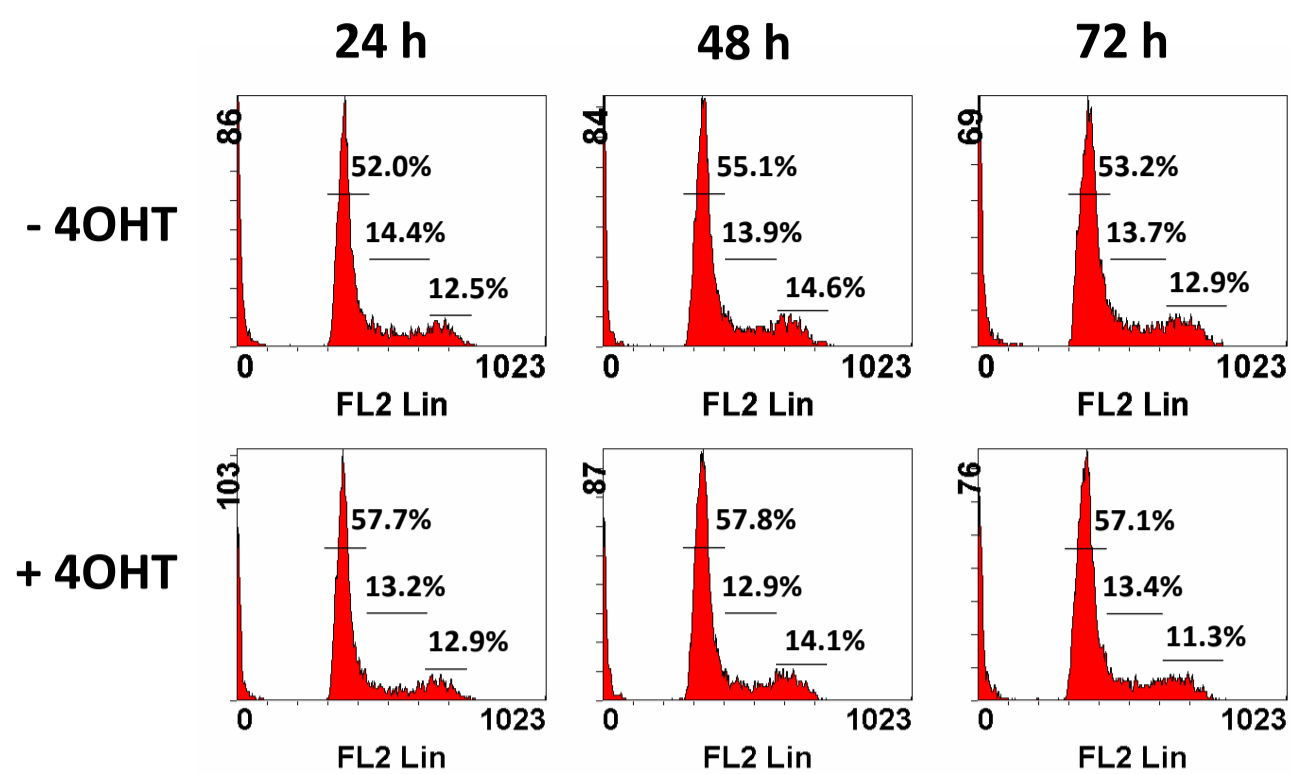

NB8/FOXO3

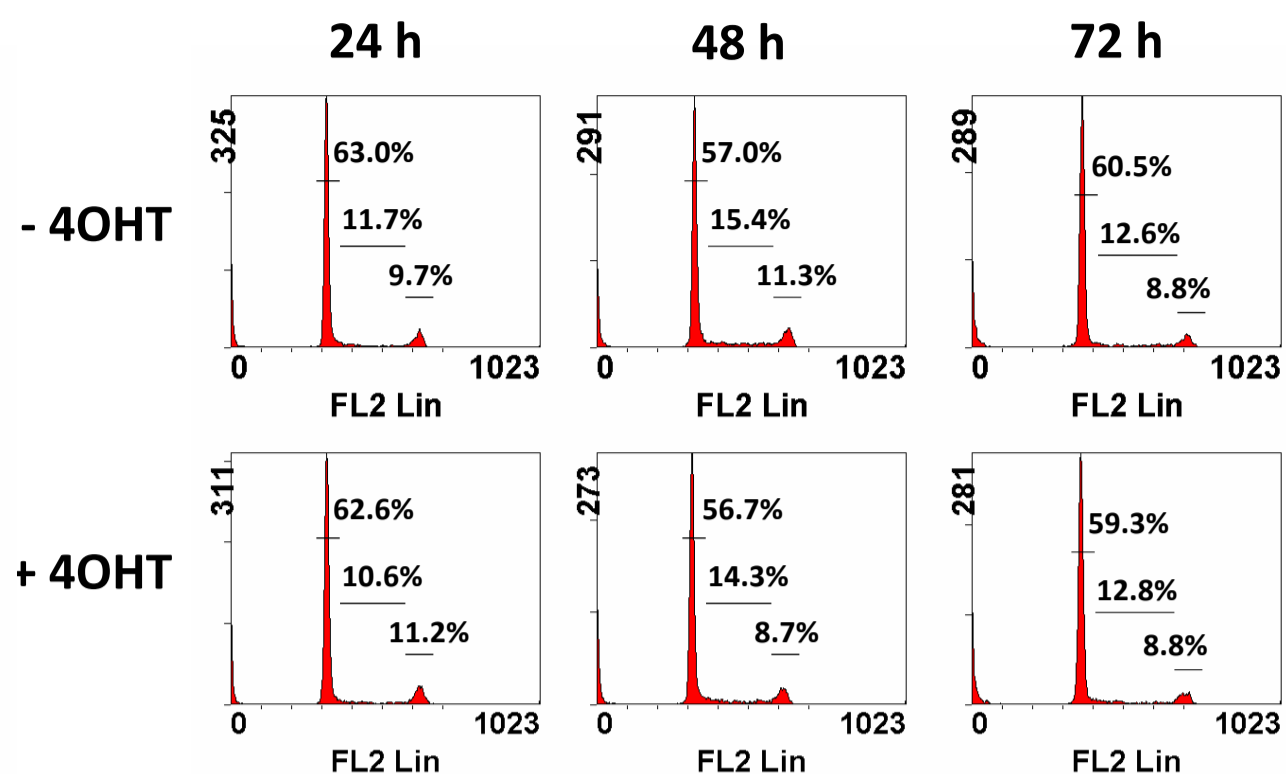

NB15/FOXO3

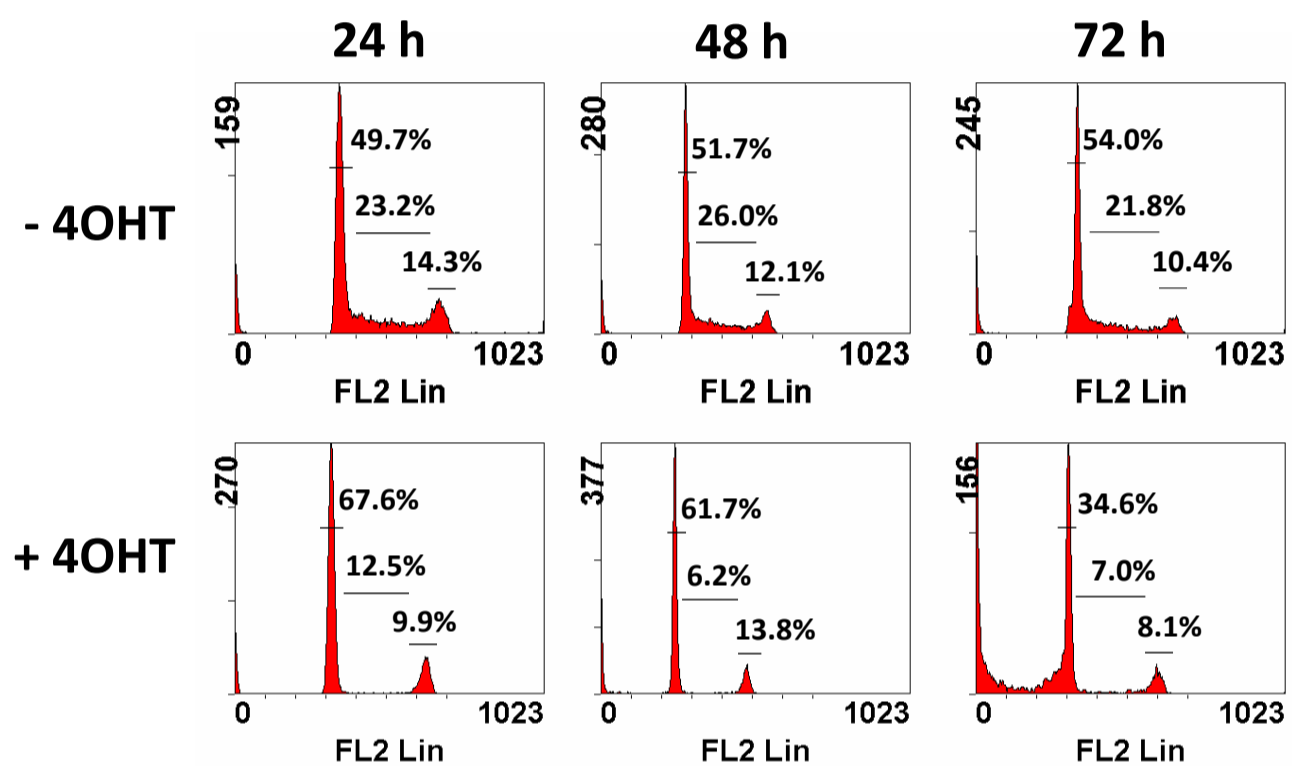

Supplemental Figure S3:

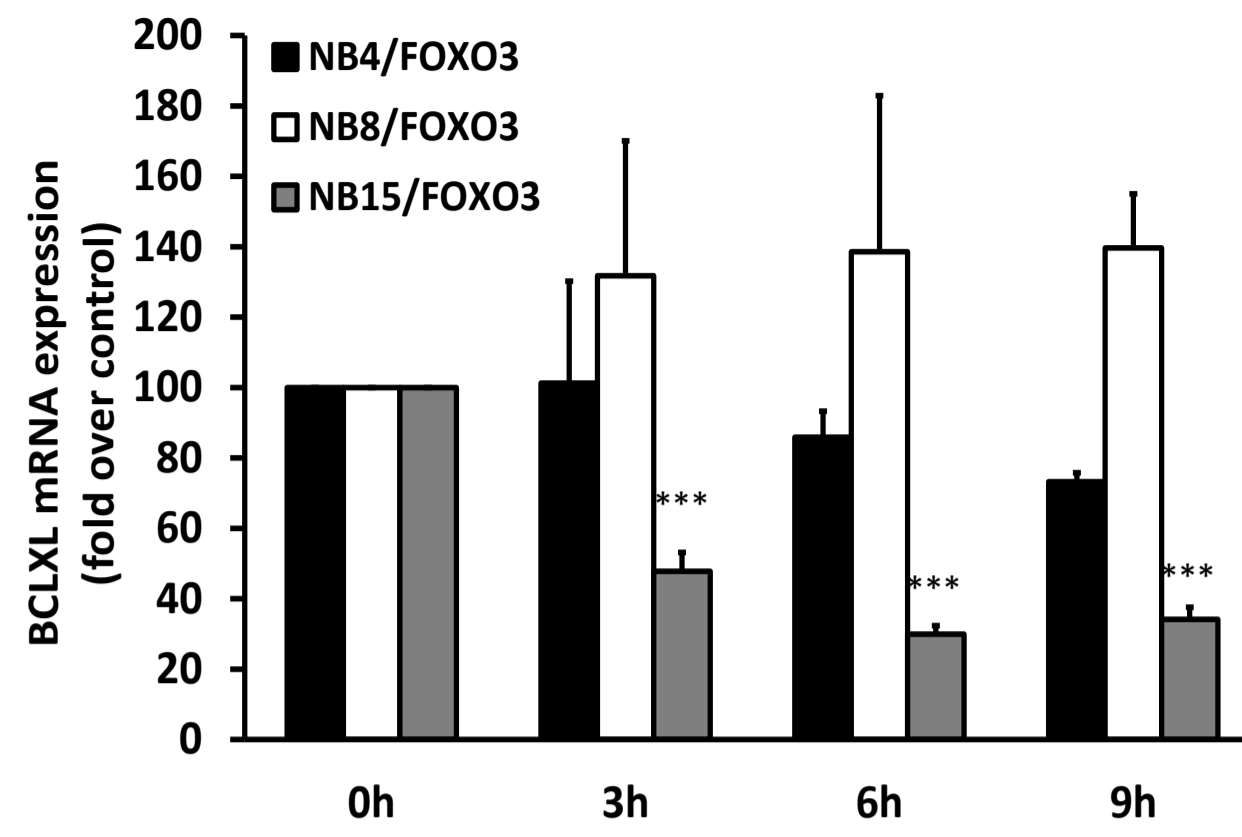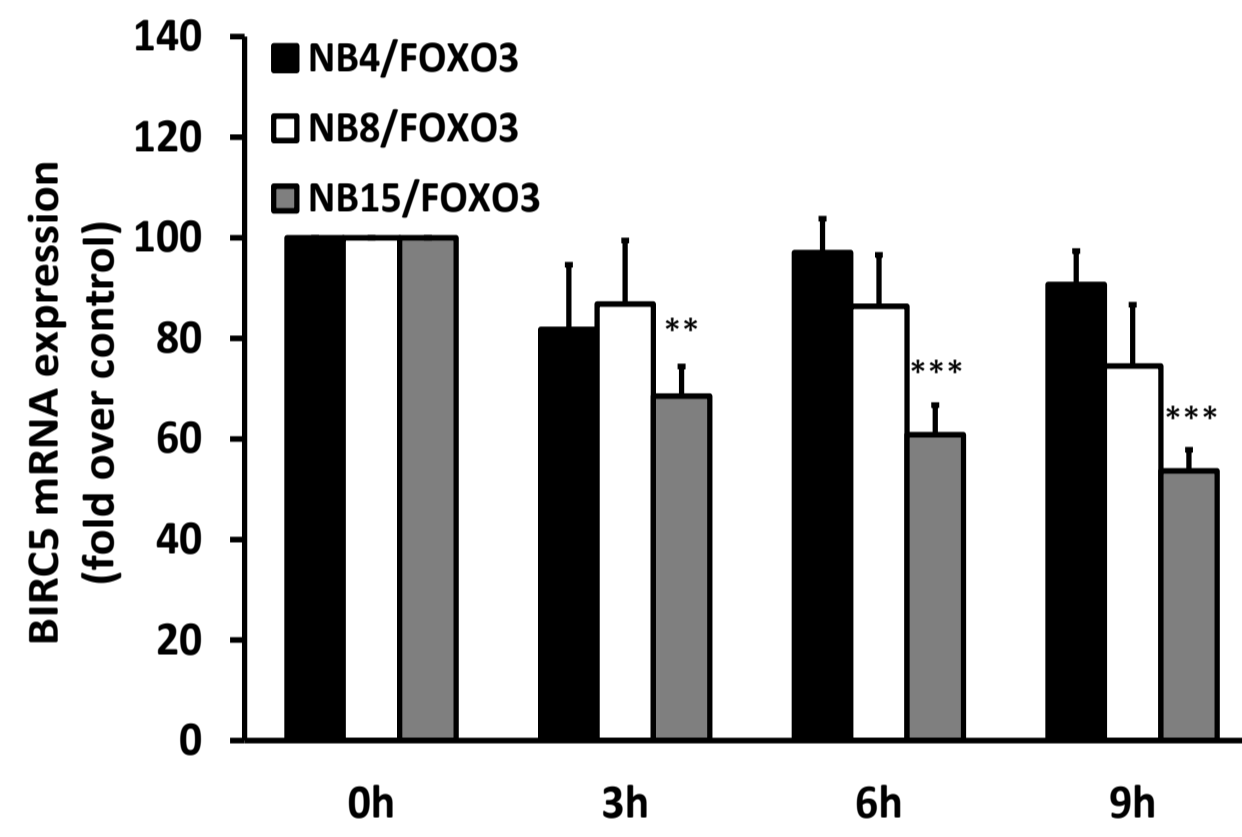

# Supplemental Figure S4:

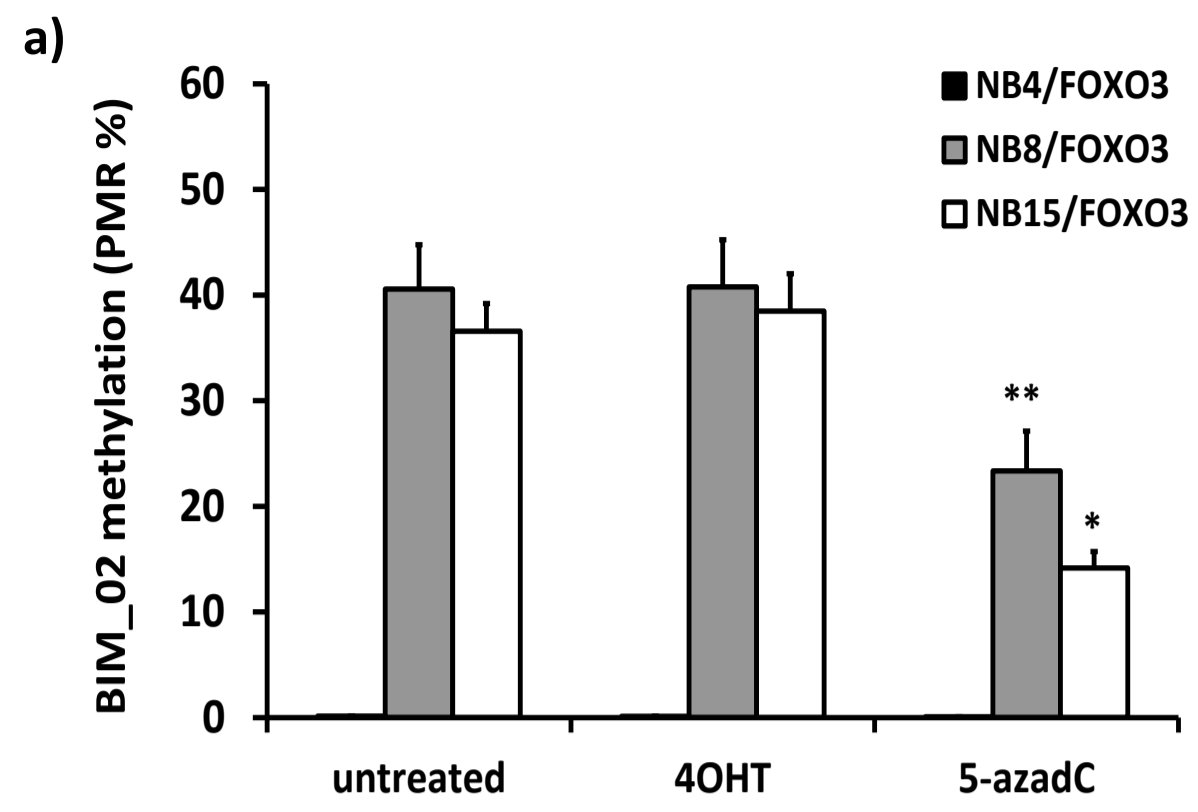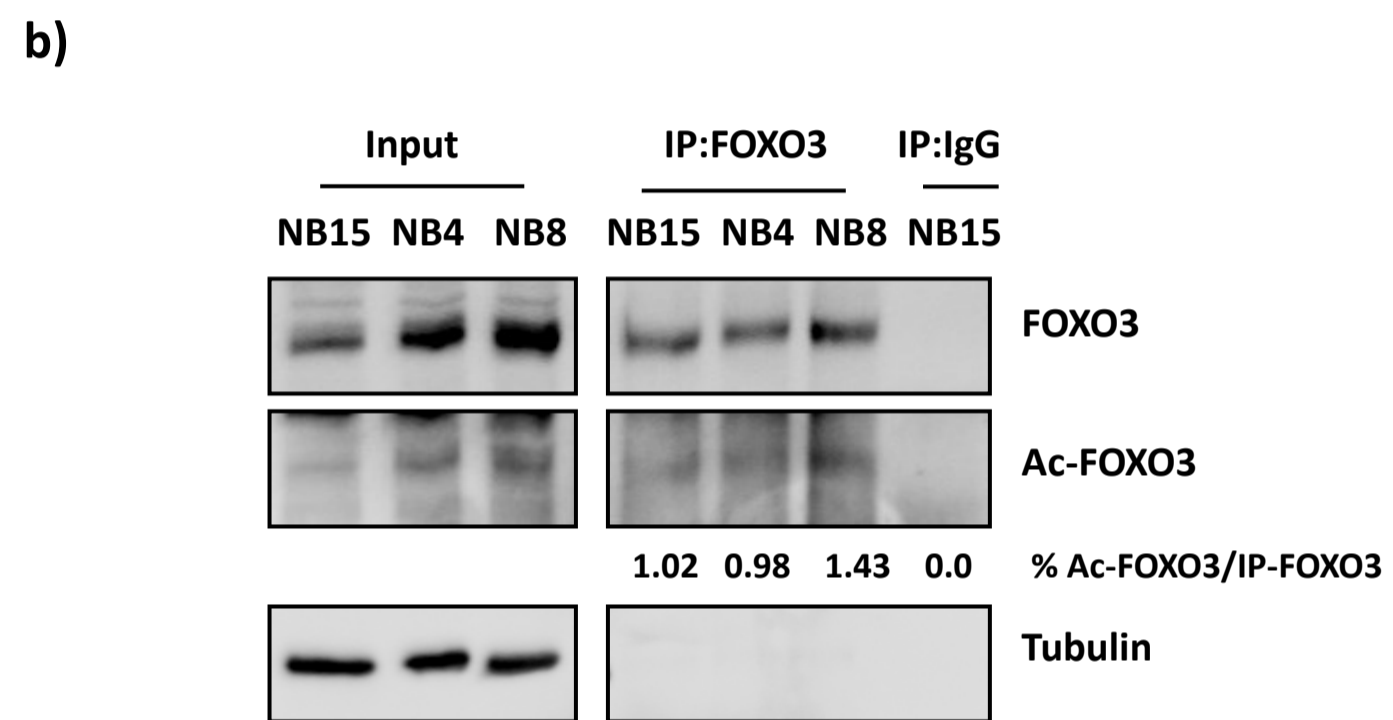

Supplemental Figure S5:

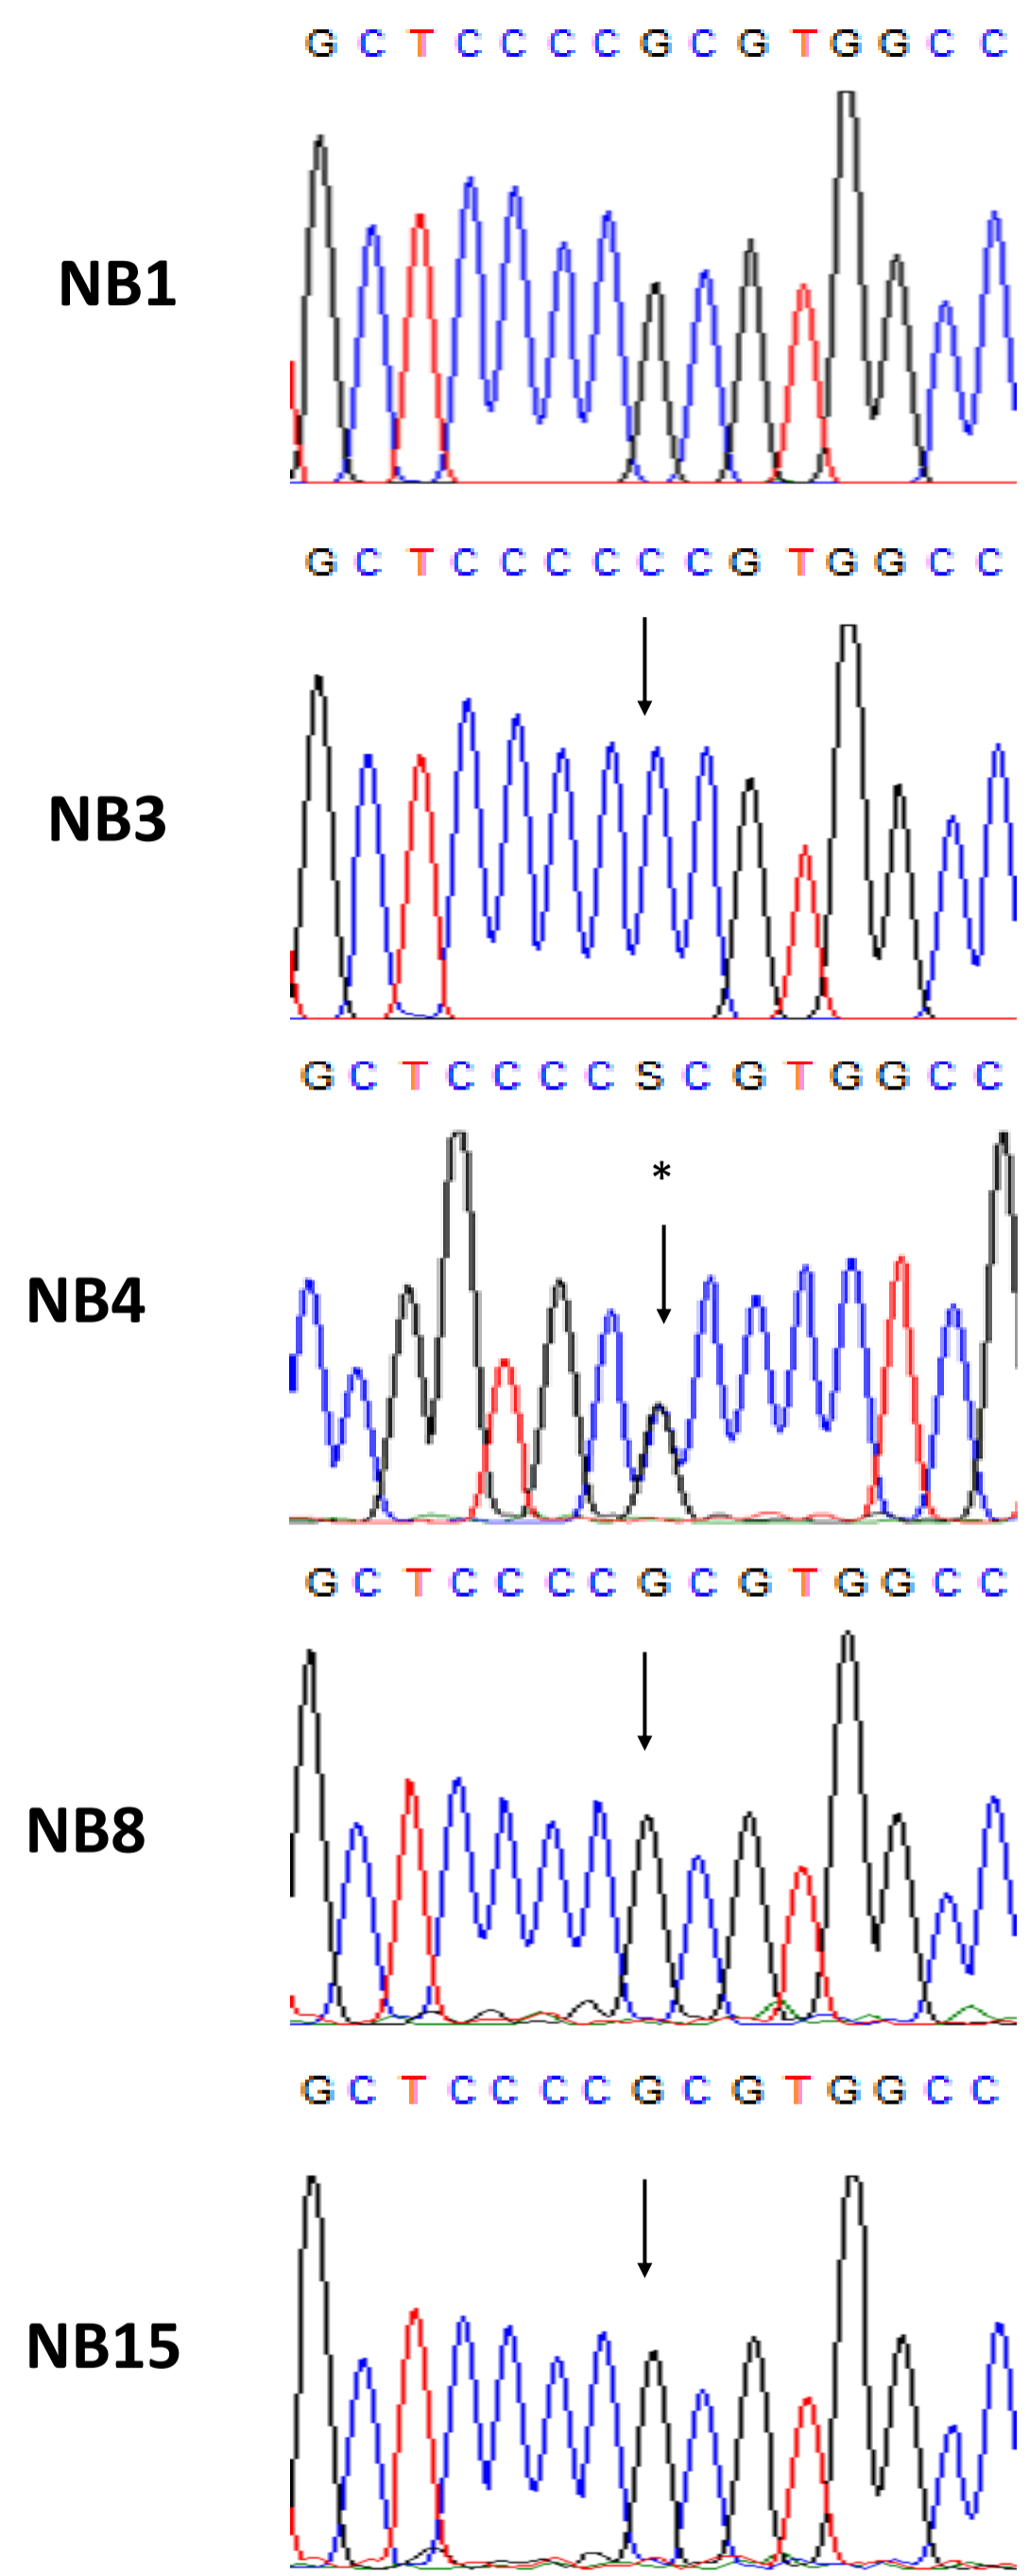

**TP53 (homo sapiens) 393 aa**

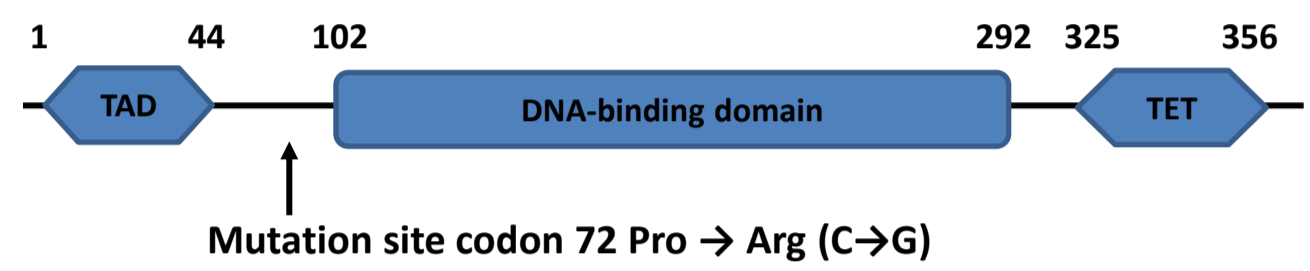

|           |                                     |
|-----------|-------------------------------------|
| TP53 wt   | ATGCCAGAGGCTGCTCCCCCGTGGCCCCTGCACC  |
| TP53 NB1  | ATGCCAGAGGCTGCTCCCCCGTGGCCCCTGCACC  |
| TP53 NB3  | ATGCCAGAGGCTGCTCCCCCGTGGCCCCTGCACC  |
| TP53 NB4  | ATGCCAGAGGCTGCTCCCCSCGTGGCCCCTGCACC |
| TP53 NB8  | ATGCCAGAGGCTGCTCCCCCGTGGCCCCTGCACC  |
| TP53 NB15 | ATGCCAGAGGCTGCTCCCCCGTGGCCCCTGCACC  |

Supplemental Figure S6:

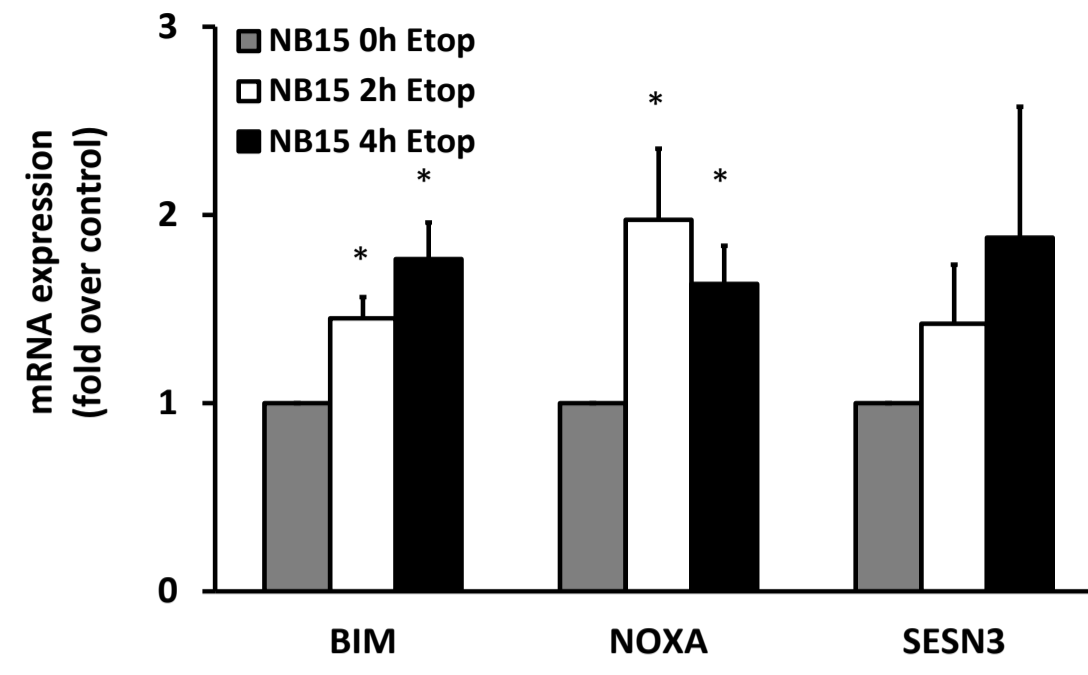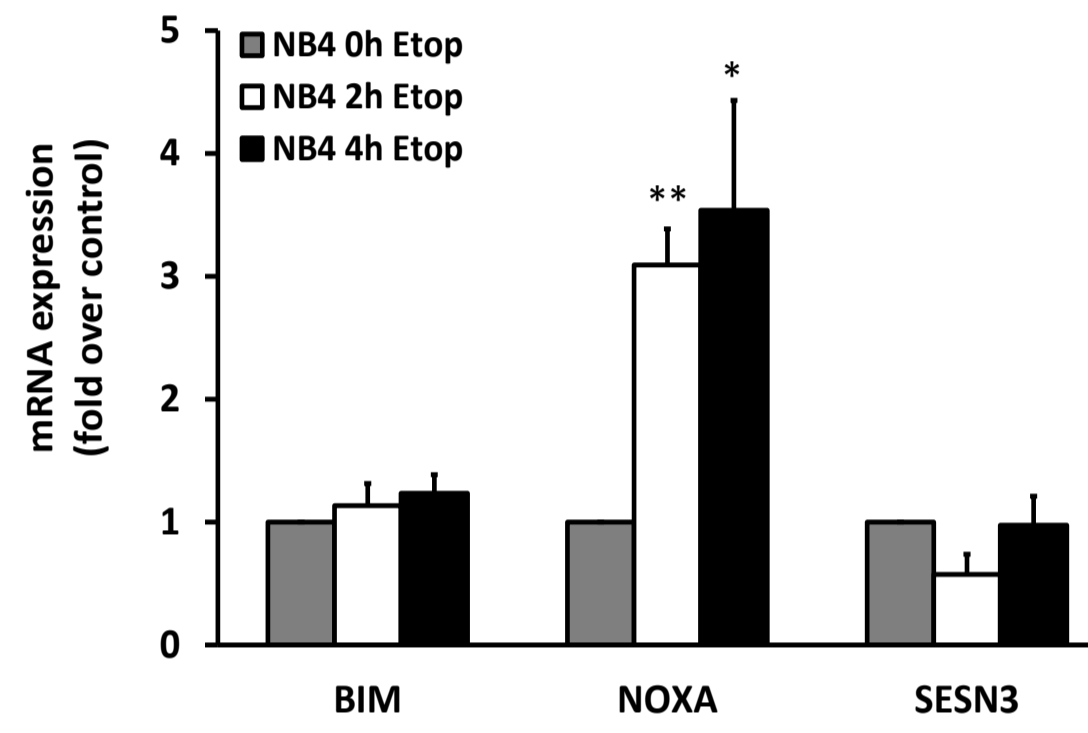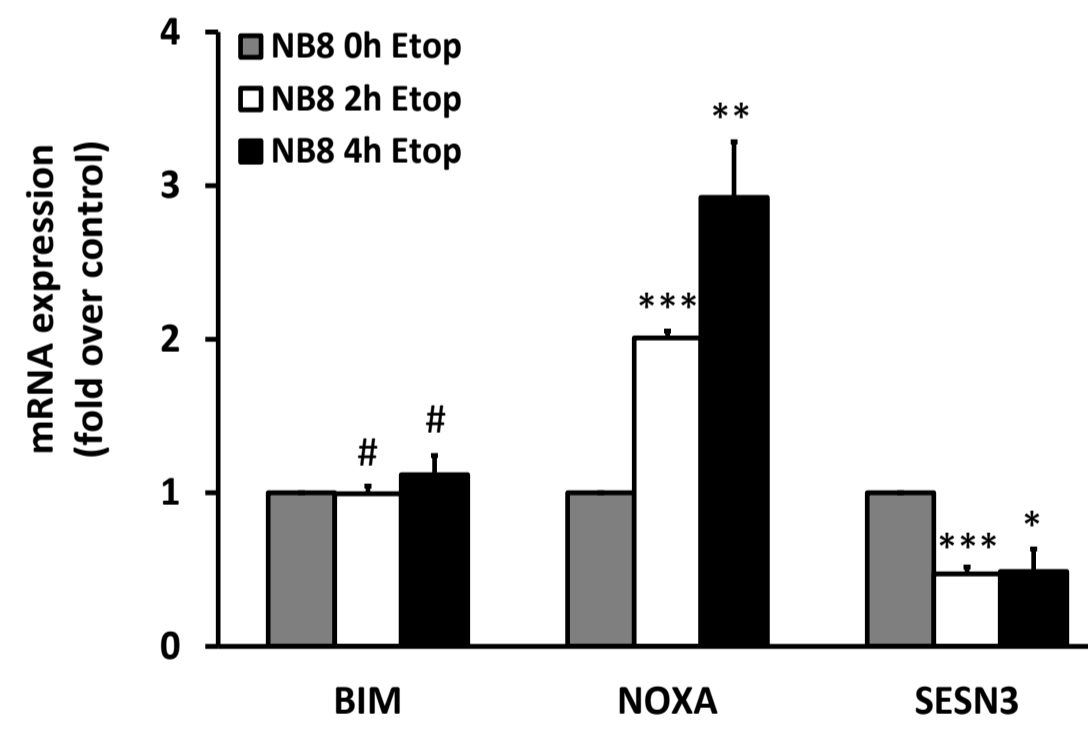

Supplemental Figure S7:

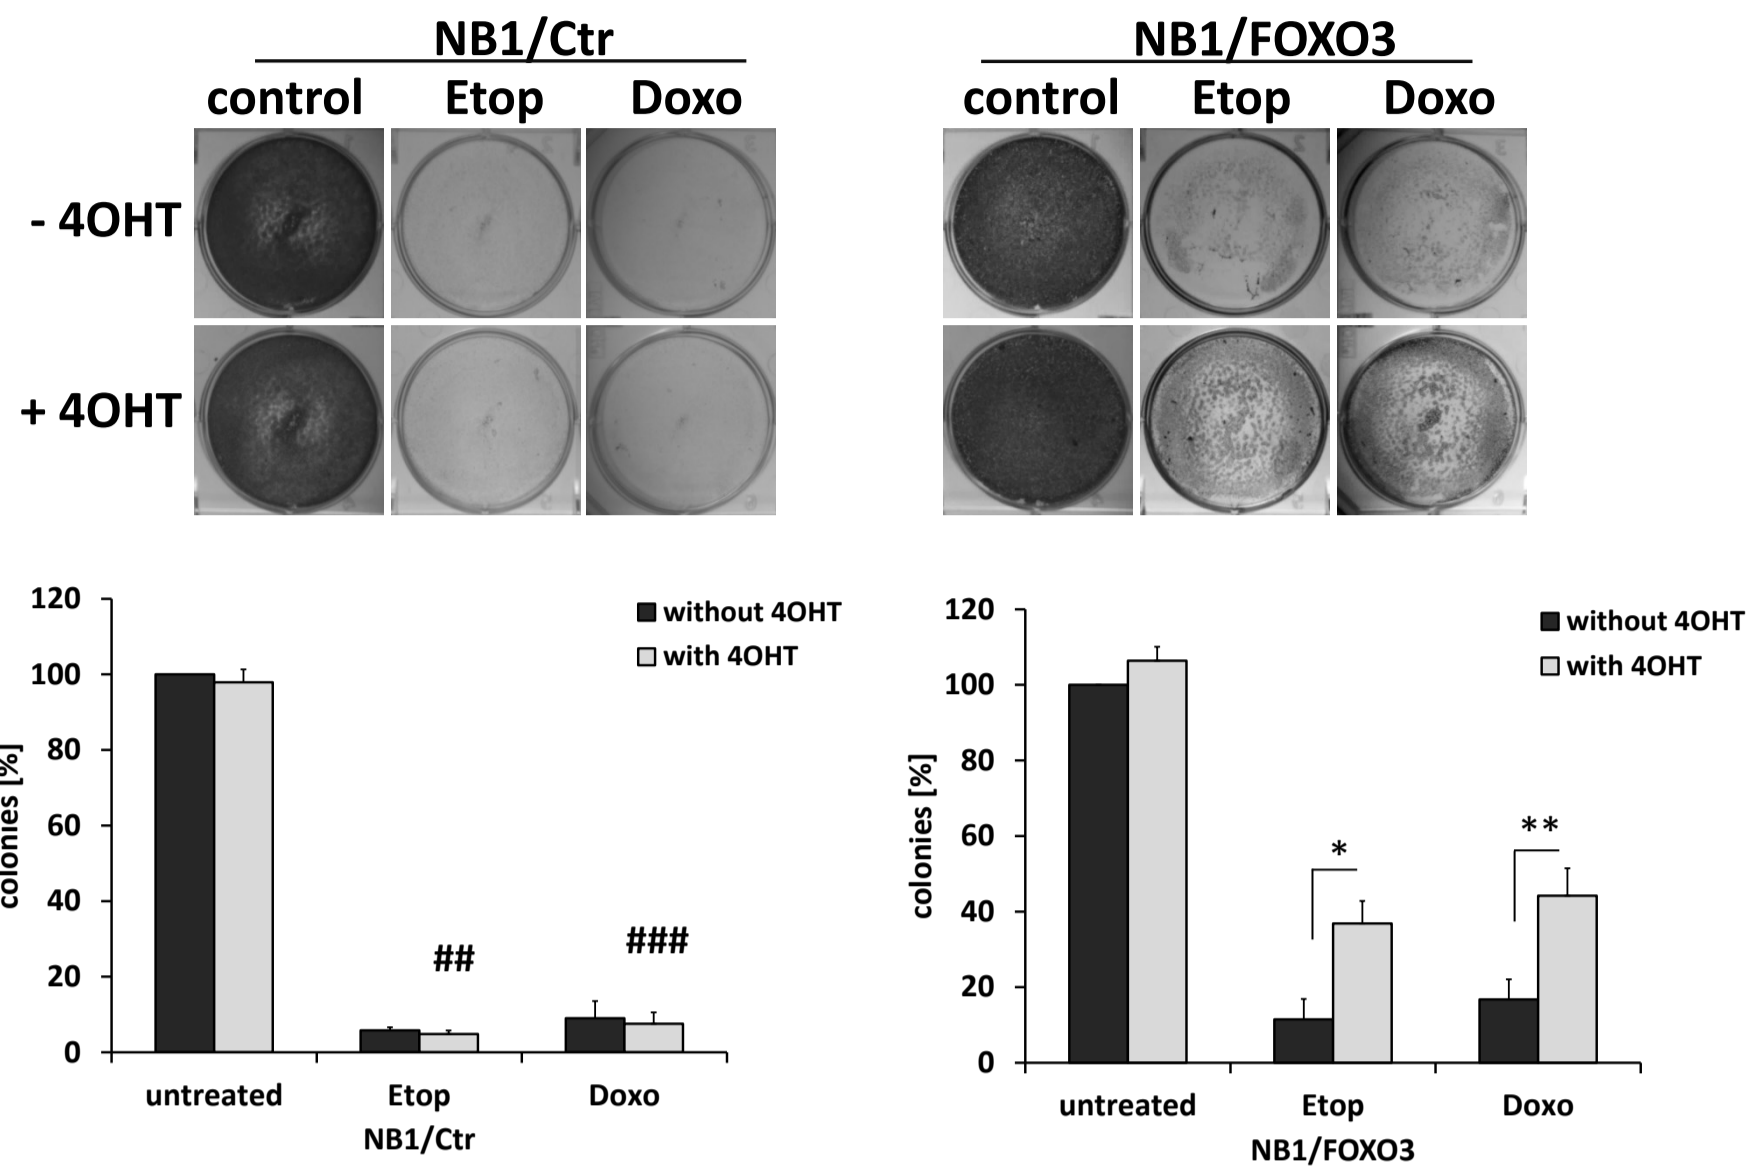



# Supplemental Figure S8:

a)

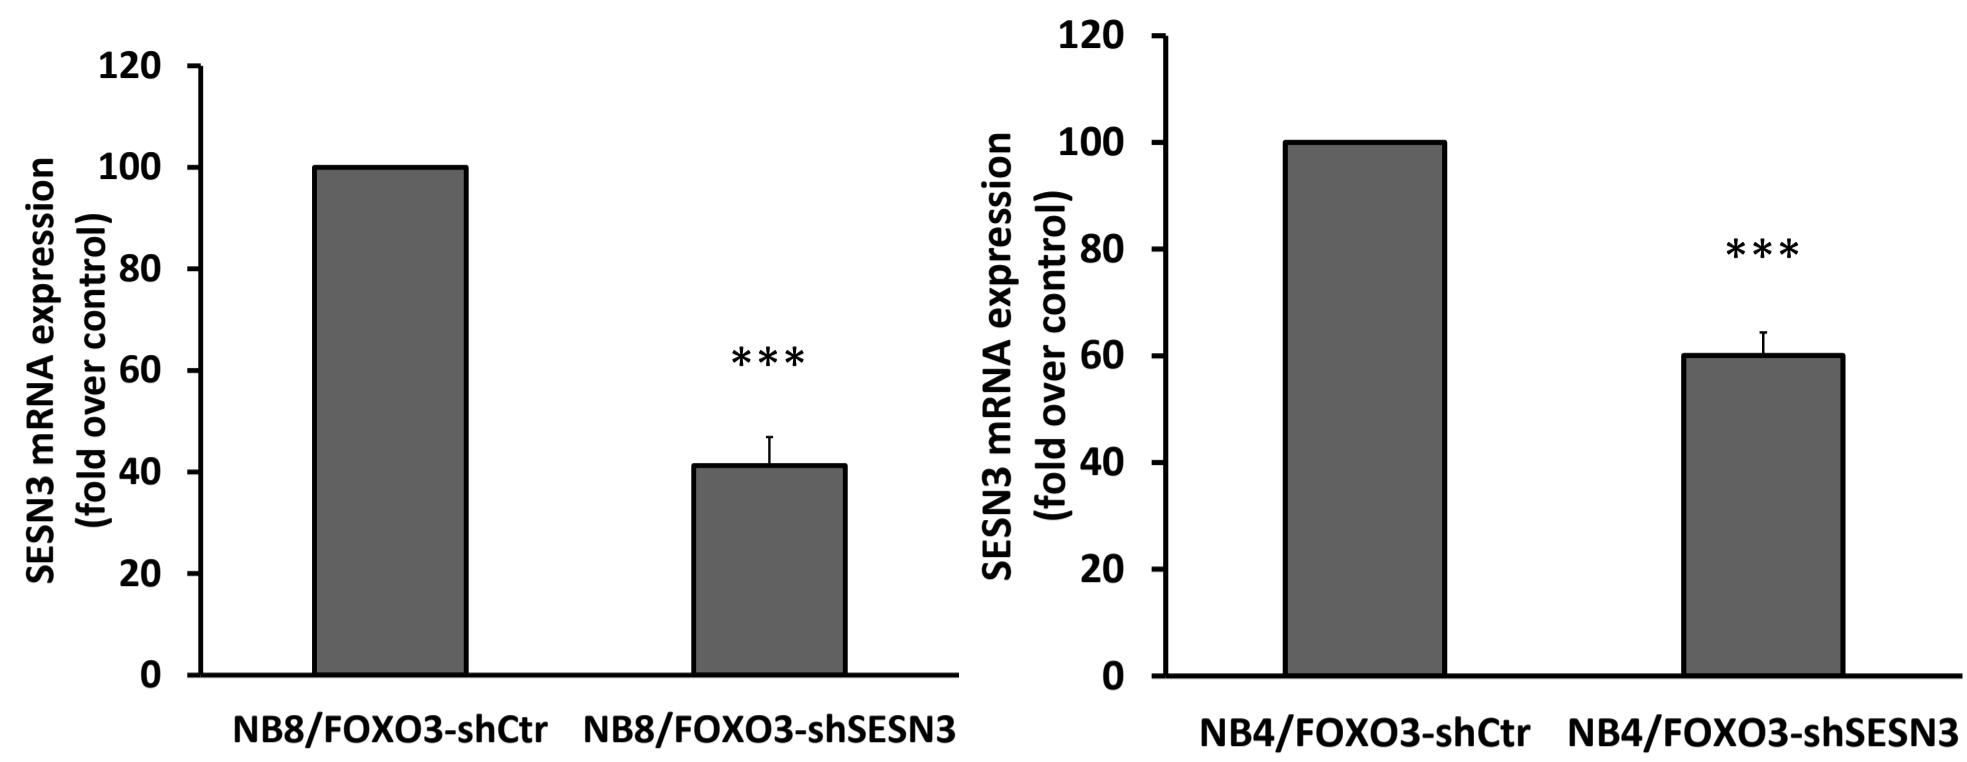

b)

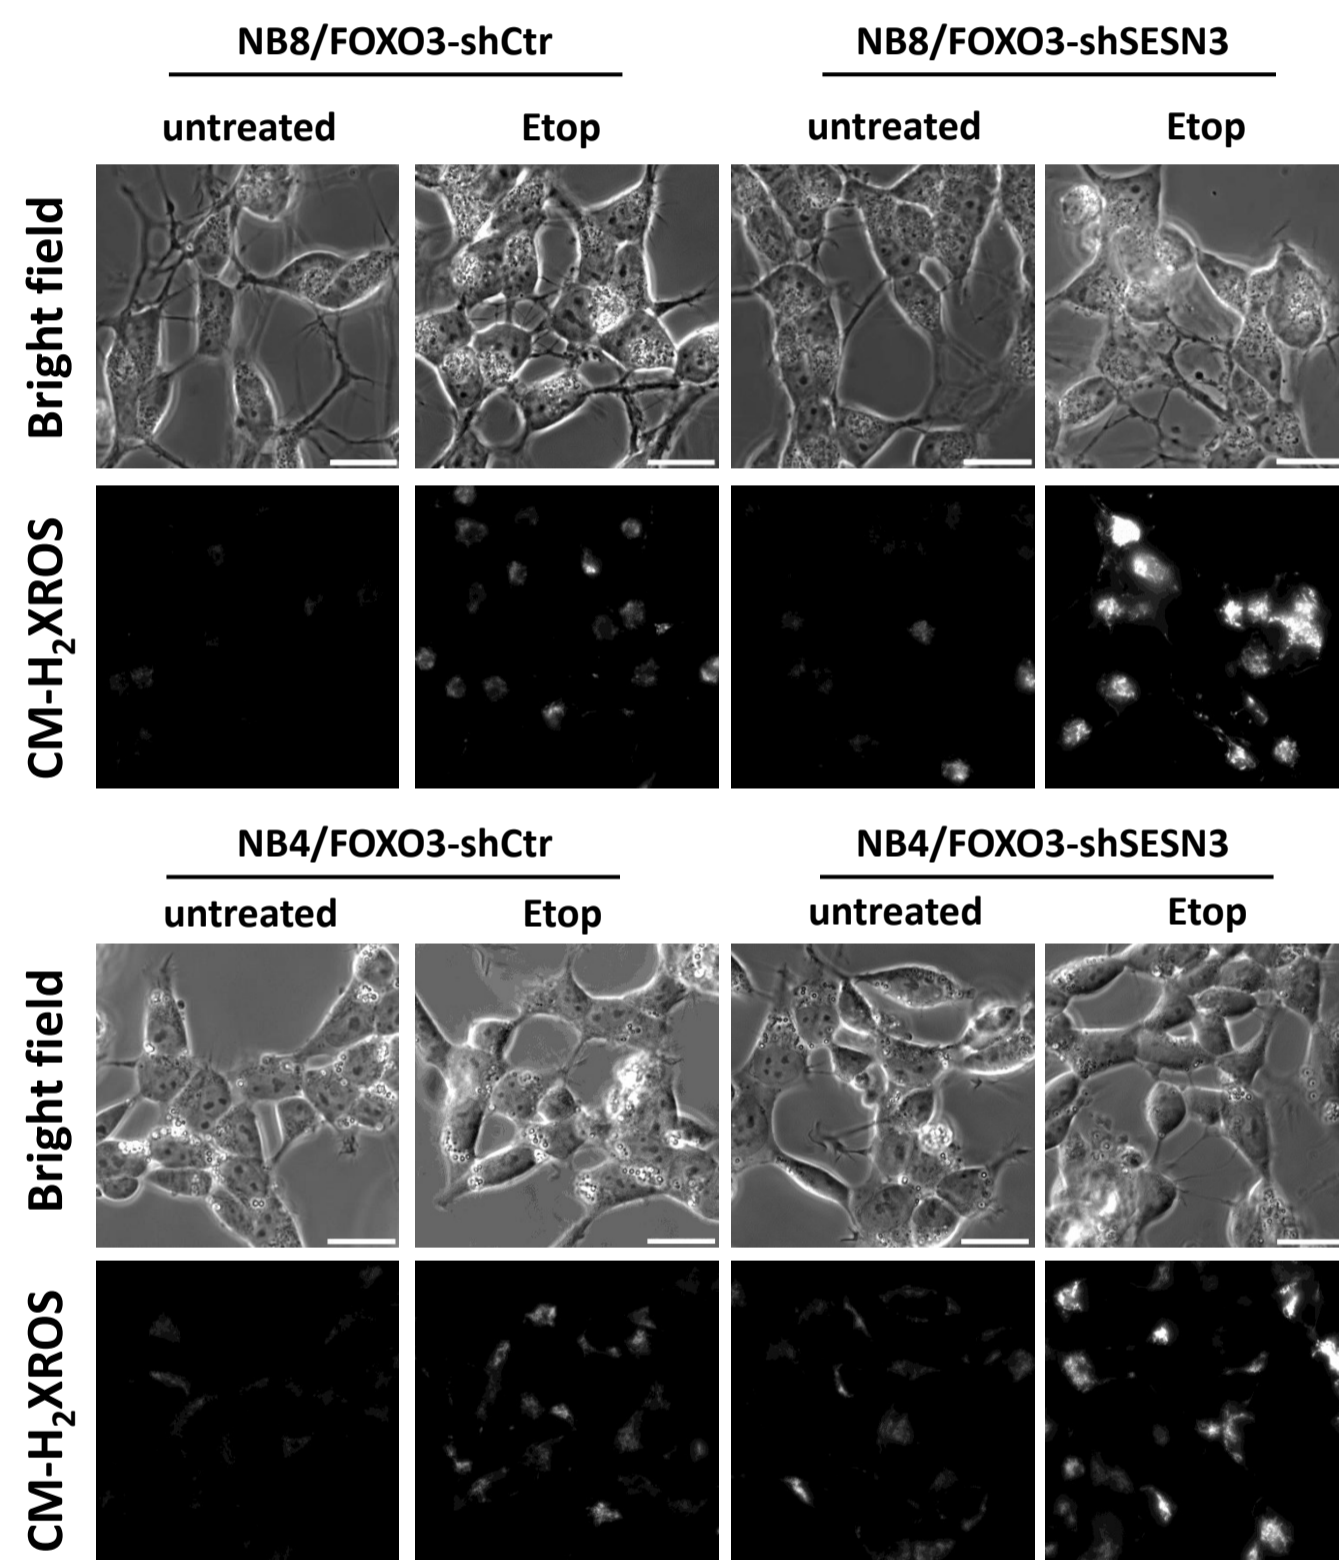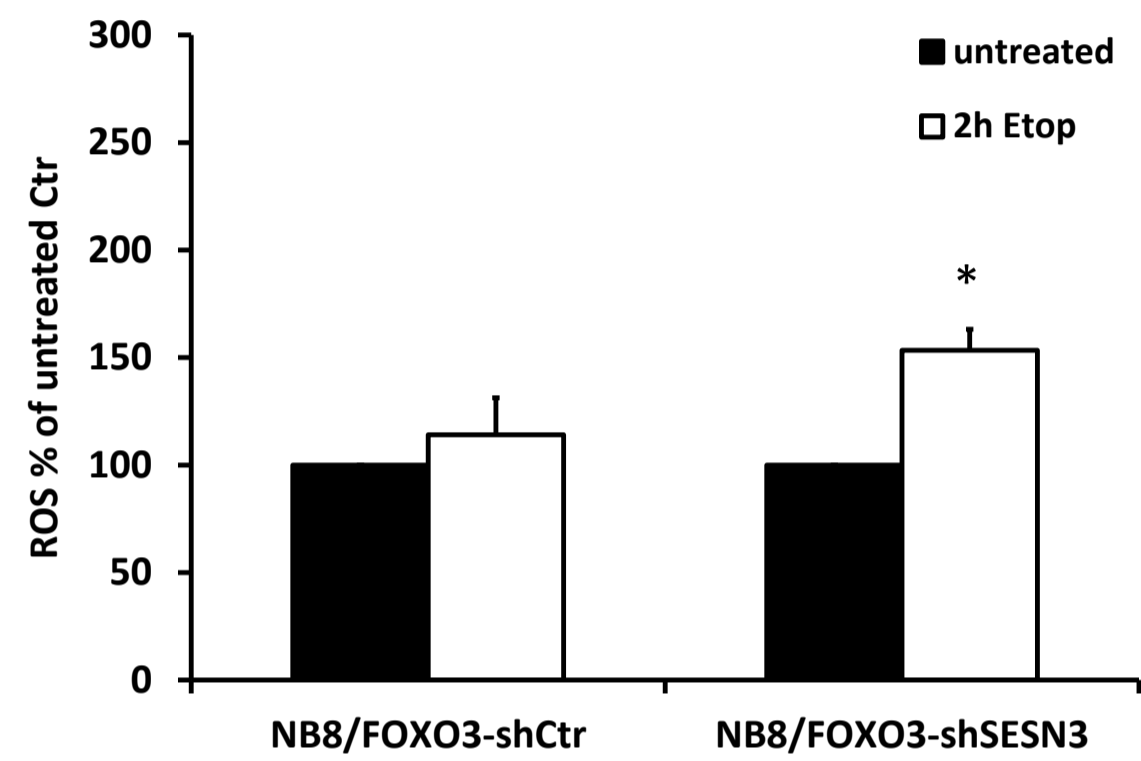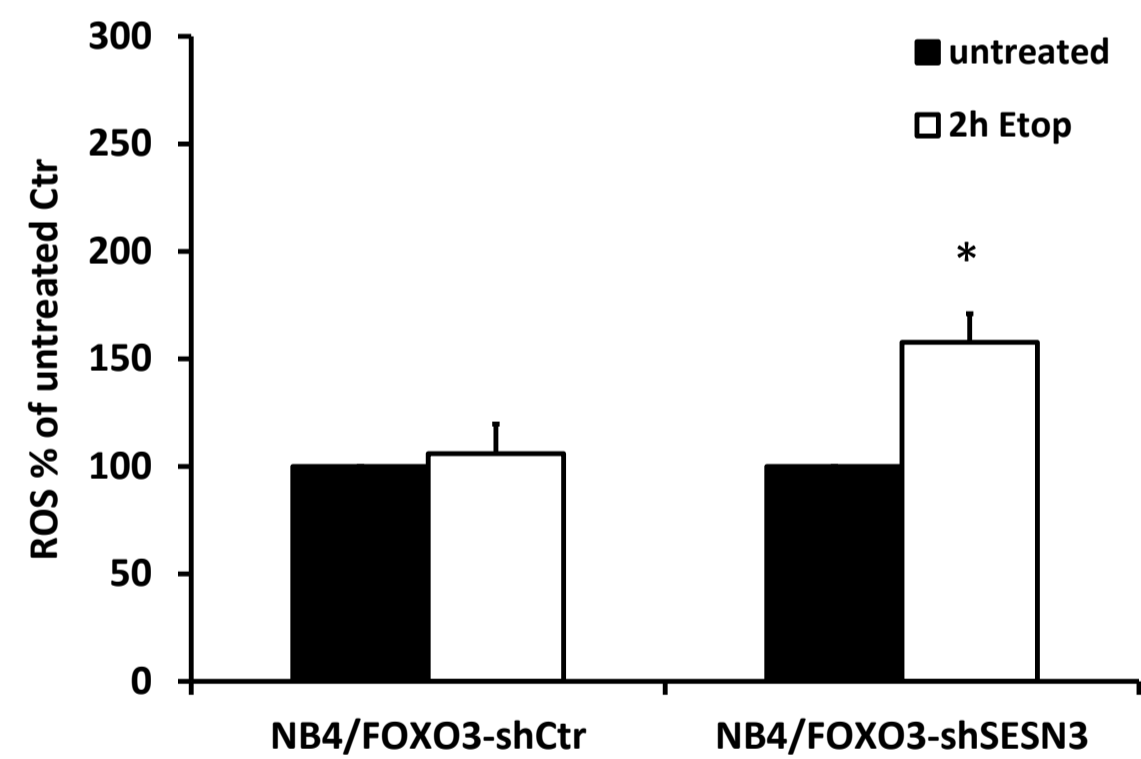

c)

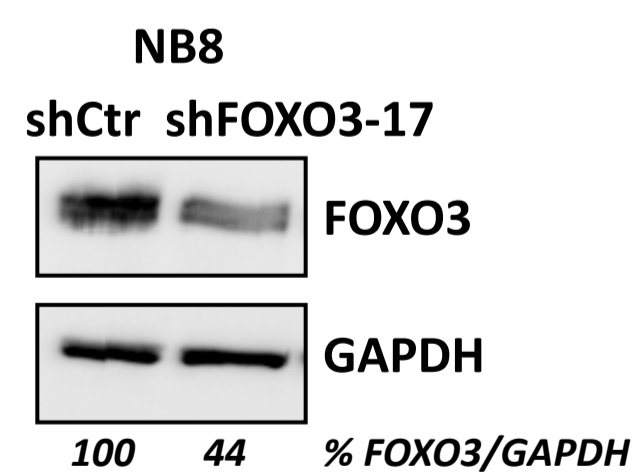

Supplement: onc2017288x1.pdf [file onc2017288x1.pdf]
